# Supplementary material for: Strain relaxation in monolayer MoS2 over flexible substrate
Source: Royal Society of Chemistry journal article supplement (doi:10.1039/d3ra01381b), 2023-01-01
Supplement: d3ra01381b1.pdf [file d3ra01381b1.pdf]

## Supplementary Information

### Strain relaxation in monolayer MoS<sub>2</sub> over flexible substrate

Nilanjan Basu<sup>1,2#</sup>, Ravindra Kumar<sup>1,2#</sup>, D. Manikandan<sup>1,2,3</sup>, Madhura Ghosh Dostidar<sup>1,2,4</sup>, Praveen Hedge<sup>1,4</sup>, Pramoda K. Nayak<sup>1,2,3,5\*</sup>, Vidya Praveen Bhallamudi<sup>1,4\*</sup>

<sup>1</sup>Department of Physics, Indian Institute of Technology Madras, Chennai 600 036, India

<sup>2</sup>2D Materials Research and Innovation Group, Indian Institute of Technology Madras, Chennai 600 036, India

<sup>3</sup>Micro Nano and Bio-Fluidics Group Indian Institute of Technology Madras, Chennai 600 036, India

<sup>4</sup>Quantum Centers in Diamond and Emerging Materials (QuCenDiEM) Group, Departments of Electrical Engineering, Indian Institute of Technology Madras, Chennai 600036, India.

<sup>5</sup>Centre for Nano and Material Sciences, Jain University, Jain Global Campus, Ramanagaram, Bangalore 562112, India

#Equally contributed to the work.

\*Address all correspondence to: [pramoda.iitm@gmail.com](mailto:pramoda.iitm@gmail.com); [praveen.bhallamudi@iitm.ac.in](mailto:praveen.bhallamudi@iitm.ac.in)

## S1. Strain modulation setup and characterization of as grown MoS<sub>2</sub>

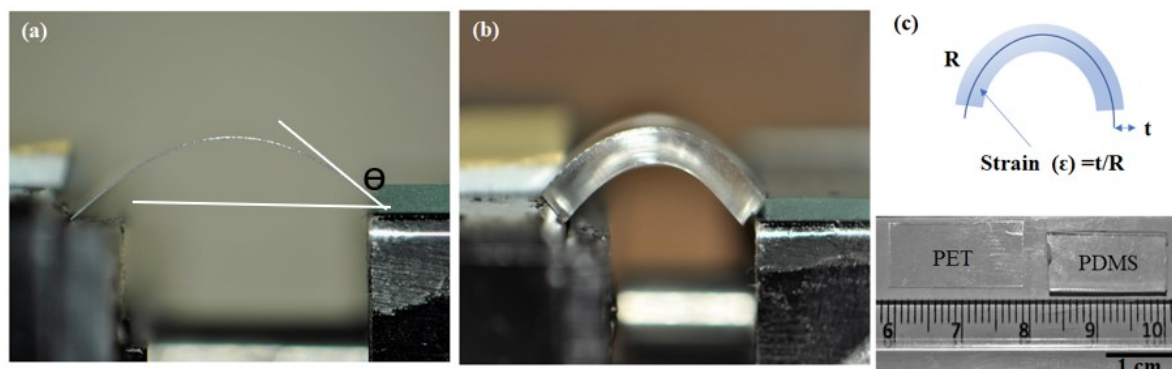

**Figure S1.** Strain modulation setup used for our experiments (a) 125 μm thick PET under strain and (b) 2 mm thick PDMS under strain (c) Schematics showing calculation for strain measurement.

The % of strain was measured by bending the PET/PDMS. The  $t$  thickness of either PET/PDMS is known. The radius of curvature  $R$  is calculated by measuring the angle between the tangent and the horizontal for each applied strain from the formula -  $R = \text{length of chord} / (2 \sin \theta)$ . The chord length was measured from the sliding vernier callipers which was used to bend the PET/PDMS.

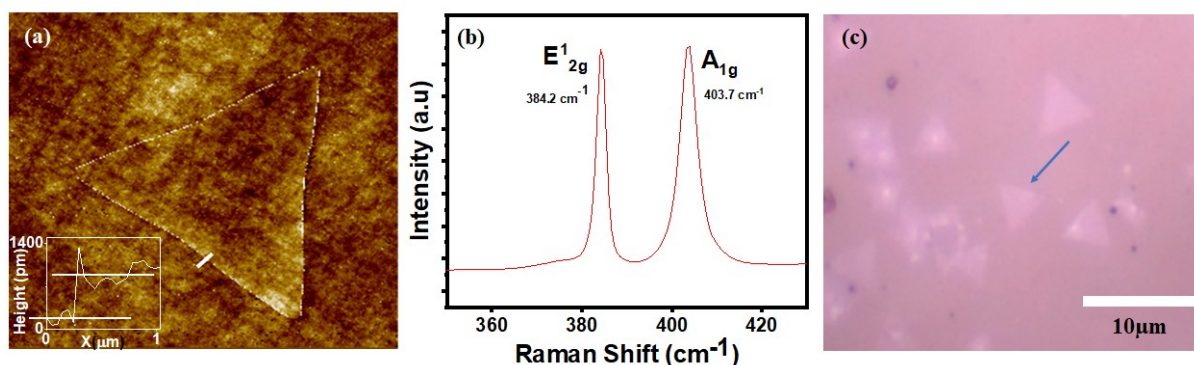

**Figure S2.** (a) AFM micrograph of 1L MoS<sub>2</sub> over SiO<sub>2</sub>/Si substrate. Inset shows the height profile with 0.83 nm thickness. The measured thickness of the as-synthesized MoS<sub>2</sub> over SiO<sub>2</sub>/Si shows that they are monolayer in nature. (b) Raman spectra of 1L MoS<sub>2</sub> over SiO<sub>2</sub>/Si. The difference between the E<sub>12g</sub> and A<sub>1g</sub> peak is 19.5 cm<sup>-1</sup>, which is consistent with the reported literature for 1 L MoS<sub>2</sub> on SiO<sub>2</sub>/Si. (c) In-situ optical micrograph of the particular flake over PET whose Raman data is shown in figure 1 (a & b).

## S2. Strain modulation in a single grain 1L MoS<sub>2</sub> flake

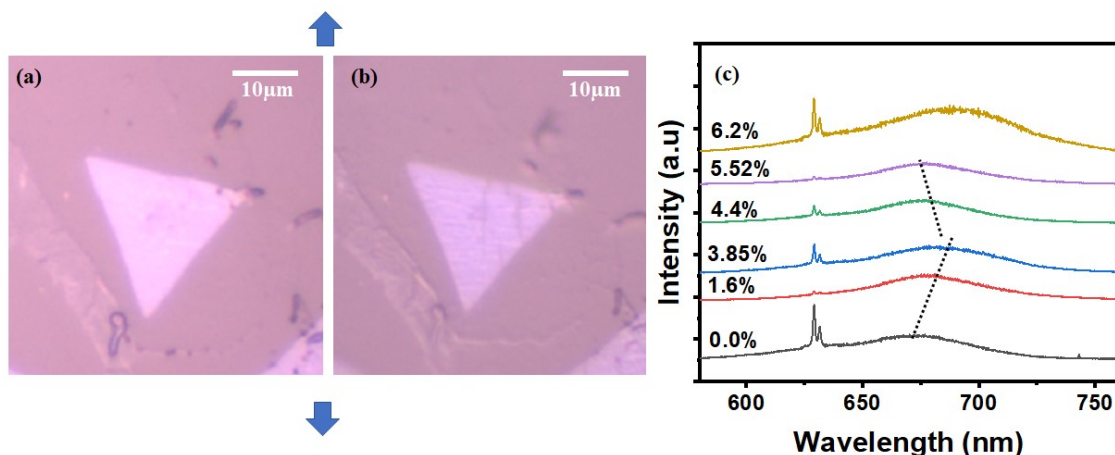

**Figure S3.** In-situ optical micrograph of another 1L MoS<sub>2</sub> flake over PDMS (a) before strain and (b) at 4.4% strain. (c) PL spectra of the particular flake marked in (a & b). The arrows indicate the strain axis.

There is a gradual redshift in PL spectra up to 3.85 % strain, further increasing the strain a blue shift is observed at 4.4 %, which indicates the start of the strain relaxation process which continues up to 5.52 %. For the single grain flake cracks appear along the strain axis which similar is like the double grain flake.

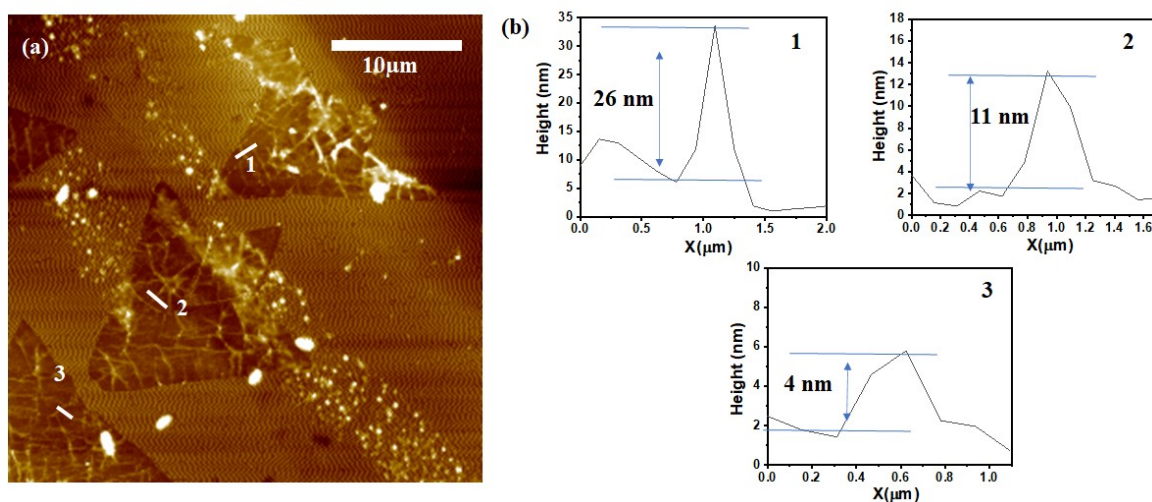

**Figure S4.** (a) Ex-situ AFM of other 1L MoS<sub>2</sub> flakes over PDMS after strain modulation. Cracks are clearly visible over all the flakes. (b) Height profile of the wrinkles marked in (a).

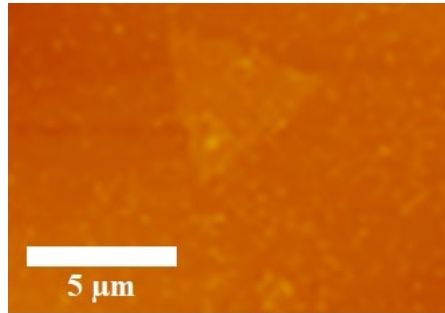

**Figure S5.** AFM micrograph of 1L MoS<sub>2</sub> after transferring over PDMS and before the application of strain. Clearly no cracks or wrinkles are visible.

### S3. Simulation of the variation of strain over pet

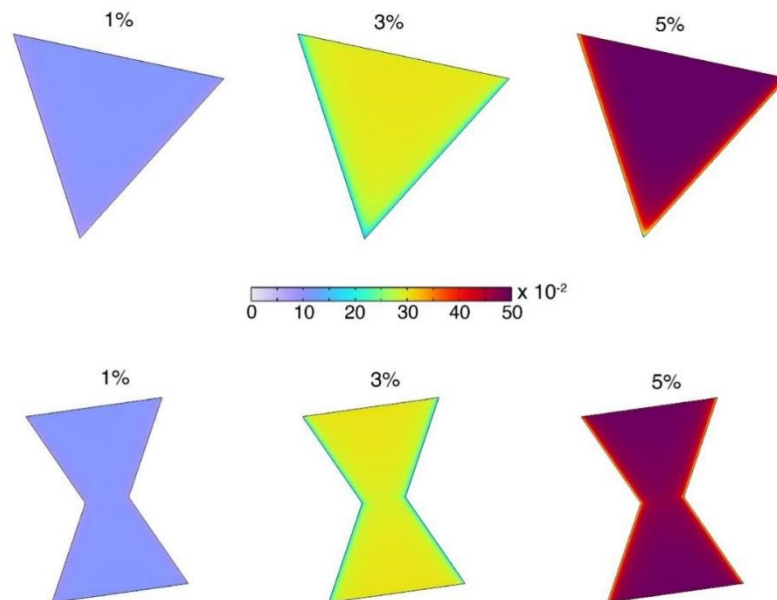

**Figure S6.** The strain variation on the single and double grain 1L MoS<sub>2</sub> transferred over the PET substrate.

**Table S1.** Materials and their parameters used for the simulations.

| Materials        | Young's Modulus (Pa) | Poisson ratio |
|------------------|----------------------|---------------|
| PDMS             | $1.527 \times 10^6$  | 0.483         |
| PET              | $3.45 \times 10^9$   | 0.43          |
| MoS <sub>2</sub> | $300 \times 10^9$    | 0.25          |

**a**
